# Supplementary material
Source: Springer Nature journal article supplement (https://www.springermedizin.de/resource/supplementary/13041_2012_174_MOESM3_ESM.pdf/25657646)

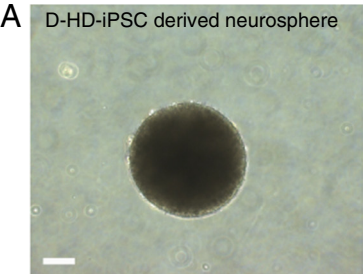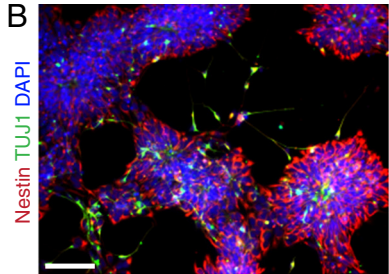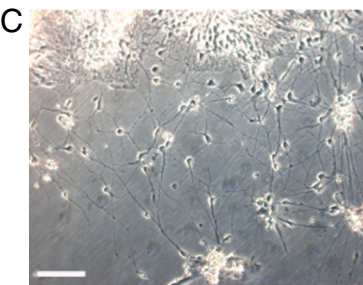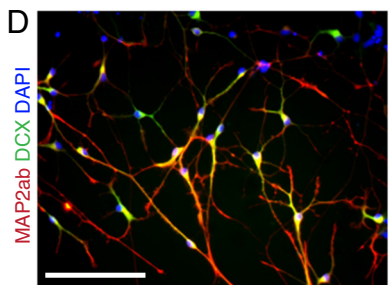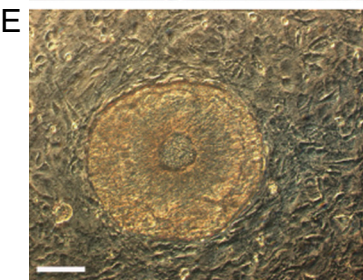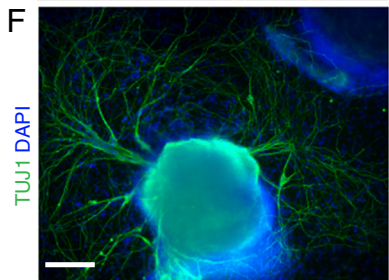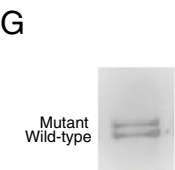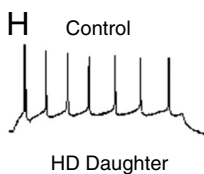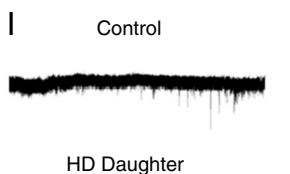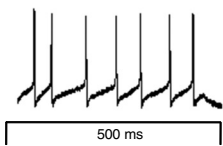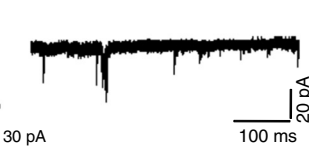

30 pA

20 pA

Supplement: MOESM3 [file 25657646]
